# Supplementary material
Source: Springer Nature journal article supplement (https://www.springermedizin.de/resource/supplementary/12865_2013_560_MOESM1_ESM.pdf/9428272)
Supplement: MOESM1 [file 9428272]

Cohort profile of immune recovery after 4 years of HAART

252 had sustained viral suppression up to 4 years

25 died

16 transfer/lost to follow-up

211 eligible for the study

Sub-optimal responders

Lowest quartile (n=52)

Median CD4 increase = 129 cells/ $\mu$ l

(Range= -43-199) cells/ $\mu$ l

29 samples were conveniently selected for NK assays

Optimal responders

2<sup>nd</sup> and 3<sup>rd</sup> quartiles (n=104)

Median CD4 increase=282 cells/ $\mu$ l

(Range=200-415) cells/ $\mu$ l

Super-optimal responders

Highest quartile (n=52)

Median CD4 increase= 528 cells/ $\mu$ l

(Range=416-878) cells/ $\mu$ l

23 samples were conveniently selected for NK assays
